# Supplementary material
Source: PubMed Central journal article supplement (PMC3867808)
Supplement: NIHMS538260-supplement-Suppl_text_and_figs.pdf [file NIHMS538260-supplement-Suppl_text_and_figs.pdf]

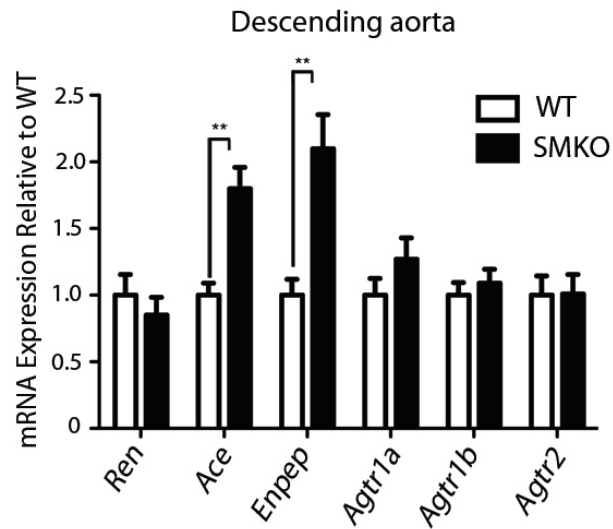

**Fig. S1.** qPCR analysis of the renin-angiotensin pathway in the descending aortas.

Descending aortas from control and SMKO mice were analyzed at 1 month old. N=4 per each genotype. Two-tailed Student *t*-test. Bars are mean ± SEM. \*\* P < 0.005.

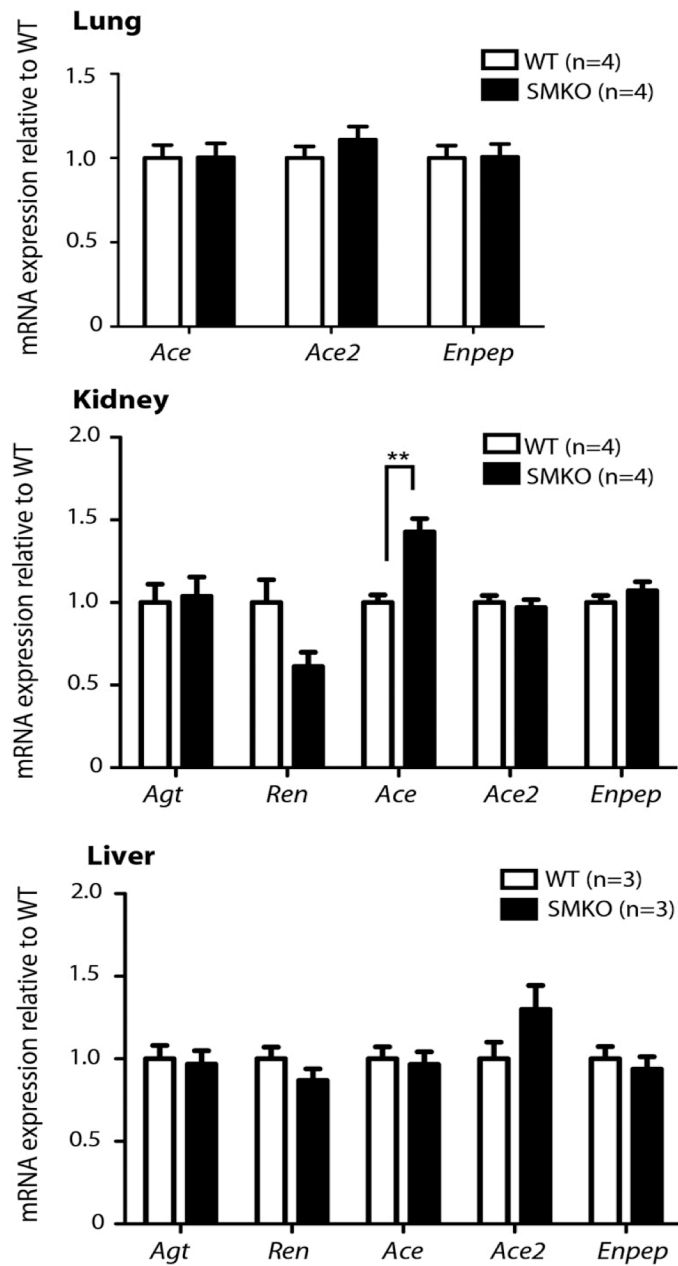

**Fig. S2.** qPCR analysis of the renin-angiotensin pathway in the lung, kidney and liver.

Indicated tissues from 3-month old WT and SMKO mice (n=4 per genotype) were analyzed.

Two-tailed Student *t*-test. Bars are mean  $\pm$  SEM. \*\*  $P < 0.005$ .

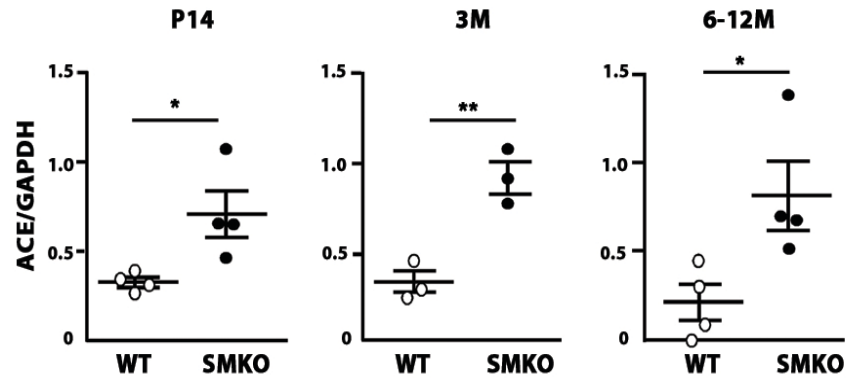

**Fig. S3.** Quantification of ACE in *Fbln4*<sup>SMKO</sup> (SMKO) mice throughout postnatal and adult life. Aortas harvested from WT and SMKO mice at P14 (n=4 per genotype), 3 months (n=3 per genotype) and 6-12 months (n=4 per genotype) were analyzed. Signal intensity was quantified and expressed as a ratio to GAPDH. Two-tailed Student *t*-test. Bars are mean  $\pm$  SEM. \* P<0.05, \*\* P < 0.005.

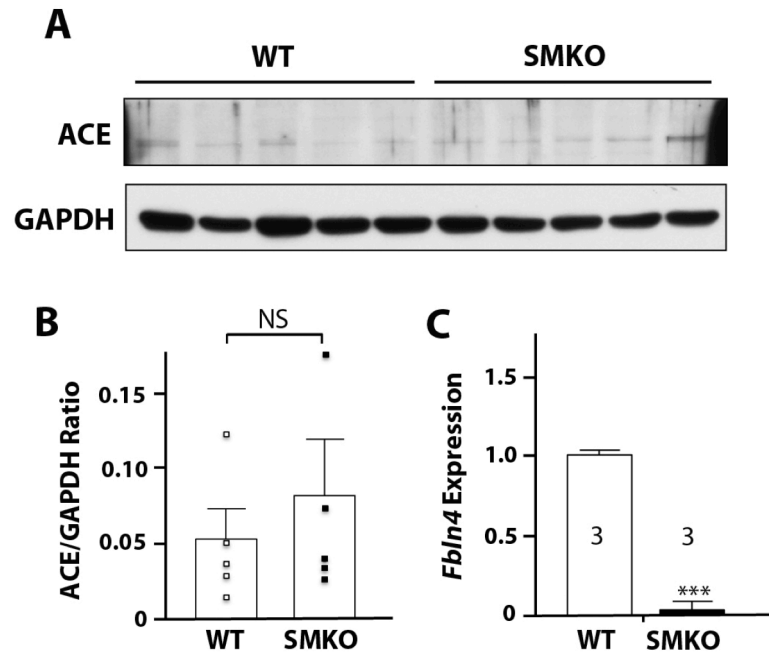

**Fig. S4.** ACE expression in primary *Fbln4*<sup>SMKO</sup> SMCs. **A.** Western blot analysis of 5 independent SMCs established from P45 WT and SMKO aortas. **B.** Signal intensity was quantified and expressed as a ratio to GAPDH. **C.** qPCR confirming the absence of *Fbln4* transcripts in SMCs. N=3 per genotype. Two-tailed Student *t*-test. Bars are mean ± SEM. NS: not significant. \*\*\* *P* < 0.001.

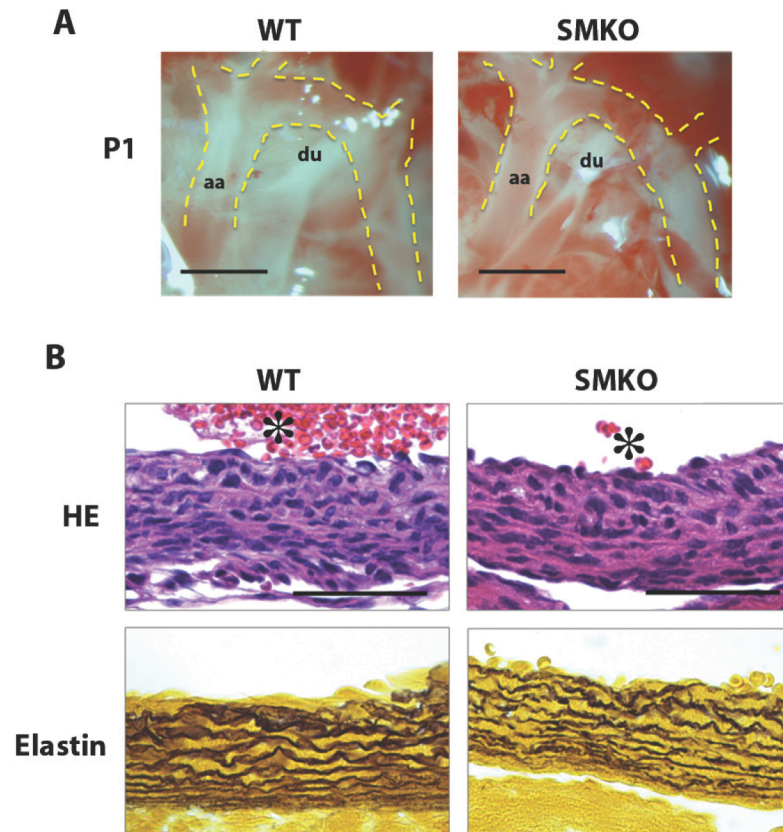

**Fig. S5.** Morphological analysis of *Fbln4*<sup>SMKO</sup> ascending aorta at P1. **A.** Representative macroscopic images of WT and SMKO aortas at P1. aa: ascending aorta; du: ductus arteriosus. Bars are 1 mm. **B.** Histological images of cross sections of ascending aorta from WT and SMKO at P1 stained with H&E and Hart's for elastin. Bars are 50  $\mu$ m.

Table S1. Animals used in morphometric analysis

| Genotype & drug                                             |                  | Number of animals |
|-------------------------------------------------------------|------------------|-------------------|
| Control                                                     | (ut)             | 6*                |
| <i>Fbln4</i> <sup>SMKO</sup>                                | (ut)             | 7                 |
| <i>Fbln4</i> <sup>SMKO</sup>                                | (d)              | 50                |
| Captopril                                                   |                  |                   |
|                                                             | Midgestation-P90 | 5                 |
| Propranolol                                                 |                  |                   |
|                                                             | Midgestation-P90 | 7                 |
| Losartan                                                    |                  |                   |
|                                                             | Midgestation-P90 | 6                 |
|                                                             | P7-P90           | 8                 |
|                                                             | P30-P90          | 7                 |
|                                                             | P7-P45           | 9                 |
| Control                                                     | (ut)             | 5**               |
| <i>Agtr1a</i> <sup>-/-</sup> ; <i>Fbln4</i> <sup>+/+</sup>  | (ut)             | 14                |
| <i>Agtr1a</i> <sup>+/+</sup> ; <i>Fbln4</i> <sup>SMKO</sup> | (ut)             | 5                 |
| <i>Agtr1a</i> <sup>+/-</sup> ; <i>Fbln4</i> <sup>SMKO</sup> | (ut)             | 12                |
| <i>Agtr1a</i> <sup>-/-</sup> ; <i>Fbln4</i> <sup>SMKO</sup> | (ut)             | 10                |
| <i>Agtr2</i> <sup>-/-</sup> ; <i>Fbln4</i> <sup>+/+</sup>   | (ut)             | 5                 |
| <i>Agtr2</i> <sup>-/-</sup> ; <i>Fbln4</i> <sup>SMKO</sup>  | (ut)             | 8                 |
| <i>Agtr2</i> <sup>-/-</sup> ; <i>Fbln4</i> <sup>+/+</sup>   | (d)              |                   |
| Losartan (midgestation-P90)                                 |                  | 5                 |
| <i>Agtr2</i> <sup>-/-</sup> ; <i>Fbln4</i> <sup>SMKO</sup>  | (d)              |                   |
| Losartan (midgestation-P90)                                 |                  | 8                 |

ut: untreated, d: drug-treated

\* *Fbln4*<sup>+/+</sup> (n=2), *Fbln4*<sup>fl/+</sup> (n=2) and *Fbln4*<sup>KO/+</sup> (n=2)

\*\* *Agtr1a*<sup>+/+</sup>;*Fbln4*<sup>+/+</sup> (n=1) and *Atr1a*<sup>+/-</sup>;*Fbln4*<sup>+/+</sup> (n=4)

Table S2. Animals used in blood pressure measurement

| Genotype & drug                   | total |
|-----------------------------------|-------|
| Control (ut)                      | 6*    |
| <i>Fbln4</i> <sup>SMKO</sup> (ut) | 6     |
| Control (d)                       | 19**  |
| Captopril                         | 6     |
| Propranolol                       | 8     |
| Losartan                          | 5     |
| <i>Fbln4</i> <sup>SMKO</sup> (d)  | 18    |
| Captopril                         | 6     |
| Propranolol                       | 7     |
| Losartan                          | 5     |

ut: untreated, d: drug-treated

\* *Fbln4*<sup>+/+</sup> (n=2), *Fbln4*<sup>KO/+</sup> (n=2) and *Fbln4*<sup>fl/+</sup> (n=2)

\*\* All *Fbln4*<sup>+/+</sup>

Table S3. Animals used in vessel biomechanics

| Genotype & drug                   | Number of animals |
|-----------------------------------|-------------------|
| Control (ut)                      | 9*                |
| <i>Fbln4</i> <sup>SMKO</sup> (ut) | 9                 |
| Control (d)                       | 25**              |
| Captopril                         | 5                 |
| Propranolol                       | 8                 |
| Losartan                          | 12                |
| <i>Fbln4</i> <sup>SMKO</sup> (d)  | 26                |
| Captopril                         | 10                |
| Propranolol                       | 6                 |
| Losartan                          | 10                |

ut: untreated, d: drug-treated

\* *Fbln4*<sup>+/+</sup> (n=5), *Fbln4*<sup>KO/+</sup> (n=2), and *Fbln4*<sup>fl/+</sup> (n=2)

\*\* All *Fbln4*<sup>+/+</sup>



Table S4. qPCR primer sequences

| Gene   | Forward primer 5'-3'        | Reverse primer 5'-3'      |
|--------|-----------------------------|---------------------------|
| Agt    | cgagtgggagaggttctcaatag     | gacgtggtcggctgttct        |
| Ace    | gggcattgacctagagactgatg     | cttgggctgtccggtcata       |
| Ace2   | tcttctgcatcggatttca         | tgtcaatgcctgtttcagtagga   |
| Enpep  | ccccatgatagagacgtactttca    | cctgccatcccagcaaate       |
| Agtr1a | actcacagcaaccctccaag        | ctcagacactgttcaaaatgcac   |
| Agtr1b | cgccagcagcactgtaga          | ggaggggggtgaattcaaaa      |
| Agtr2  | ccctctctgggcaacctattact     | atcgacactcatgcaggaataaaaa |
| Ren    | ggatcagggagagtcaaagttt      | tcacagtgattccaccacagt     |
| Acta2  | atcgtccaccgcaaate           | aaggaactggaggcgtg         |
| Cnn1   | aactcatggatggcctcaaa        | accggctgcagcttgt          |
| Mlck   | agaagtcaaggaggtaaagaatgatgt | cgggtcgcctttcattgc        |
| Myh11  | tcaacgccaaccgcaggaagctg     | tgctaagcagtctgctgggct     |
| Myocd  | caccccacgacatcaaatcc        | tgcattcttctgactttctga     |
| Sm22   | gcgctgggcttcca              | caggctgttccaatttct        |
| B2m    | ccgagcccaagaccgtcta         | aactggatttgaattaagcaggtca |
| Gapdh  | tgacgtgccgctggagaaa         | agttagcccaagatgccctca     |
